# Supplementary material for: CircVAPA promotes small cell lung cancer progression by modulating the miR-377-3p and miR-494-3p/IGF1R/AKT axis
Source: PubMed Central journal article supplement (PMC9172052; doi:10.1186/s12943-022-01595-9), 2022-06-06
Supplement: 12943_2022_1595_MOESM1_ESM.pdf [file 12943_2022_1595_MOESM1_ESM.pdf]

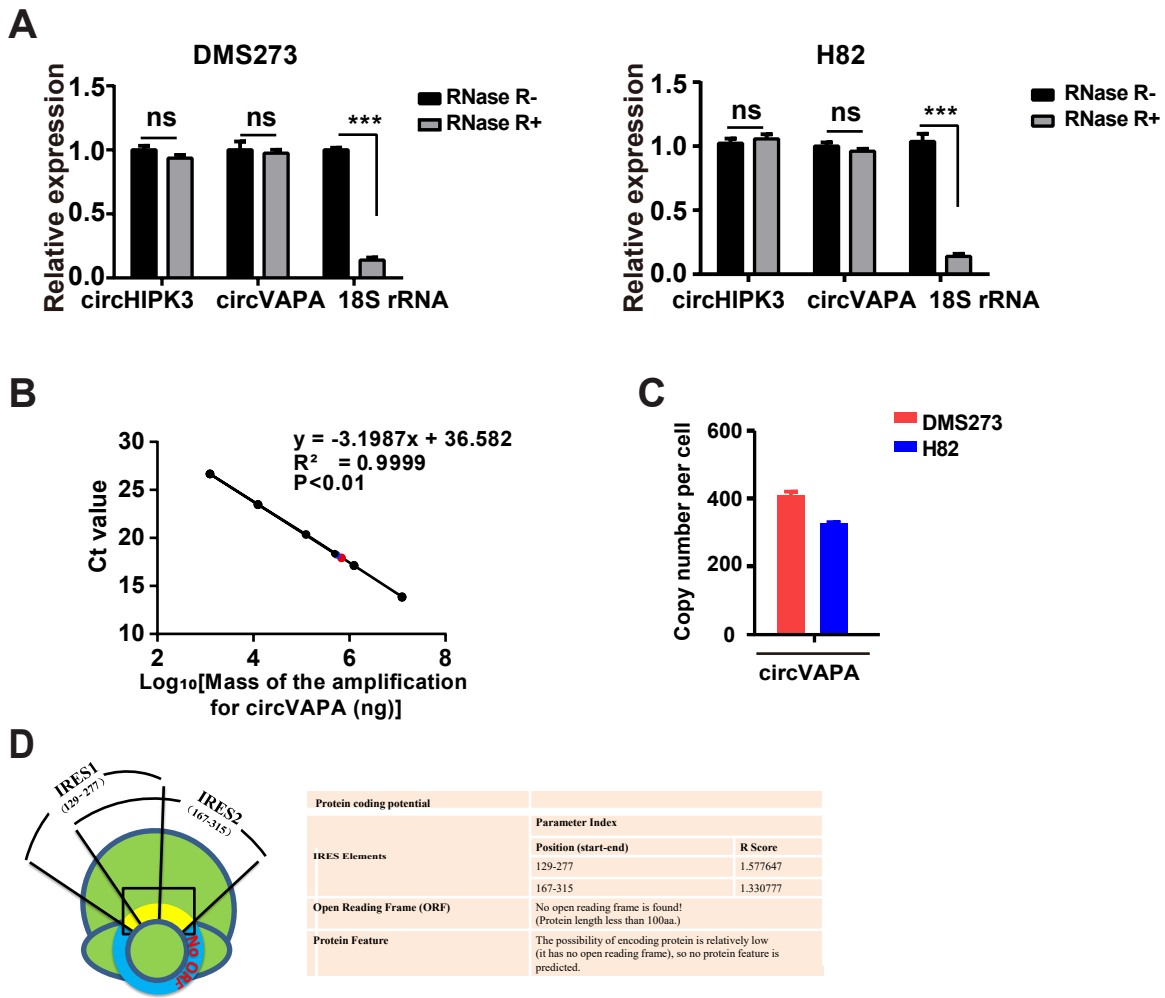

**Figure S1.**

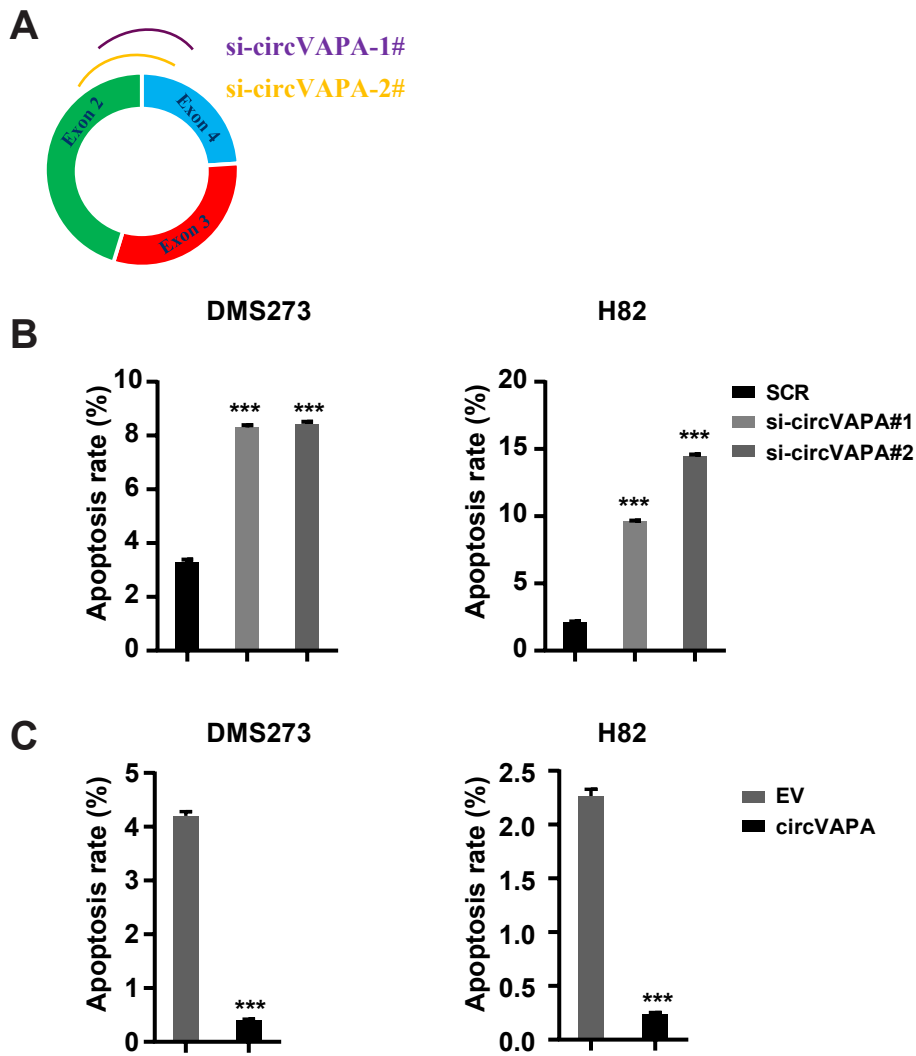

**Figure S2.**

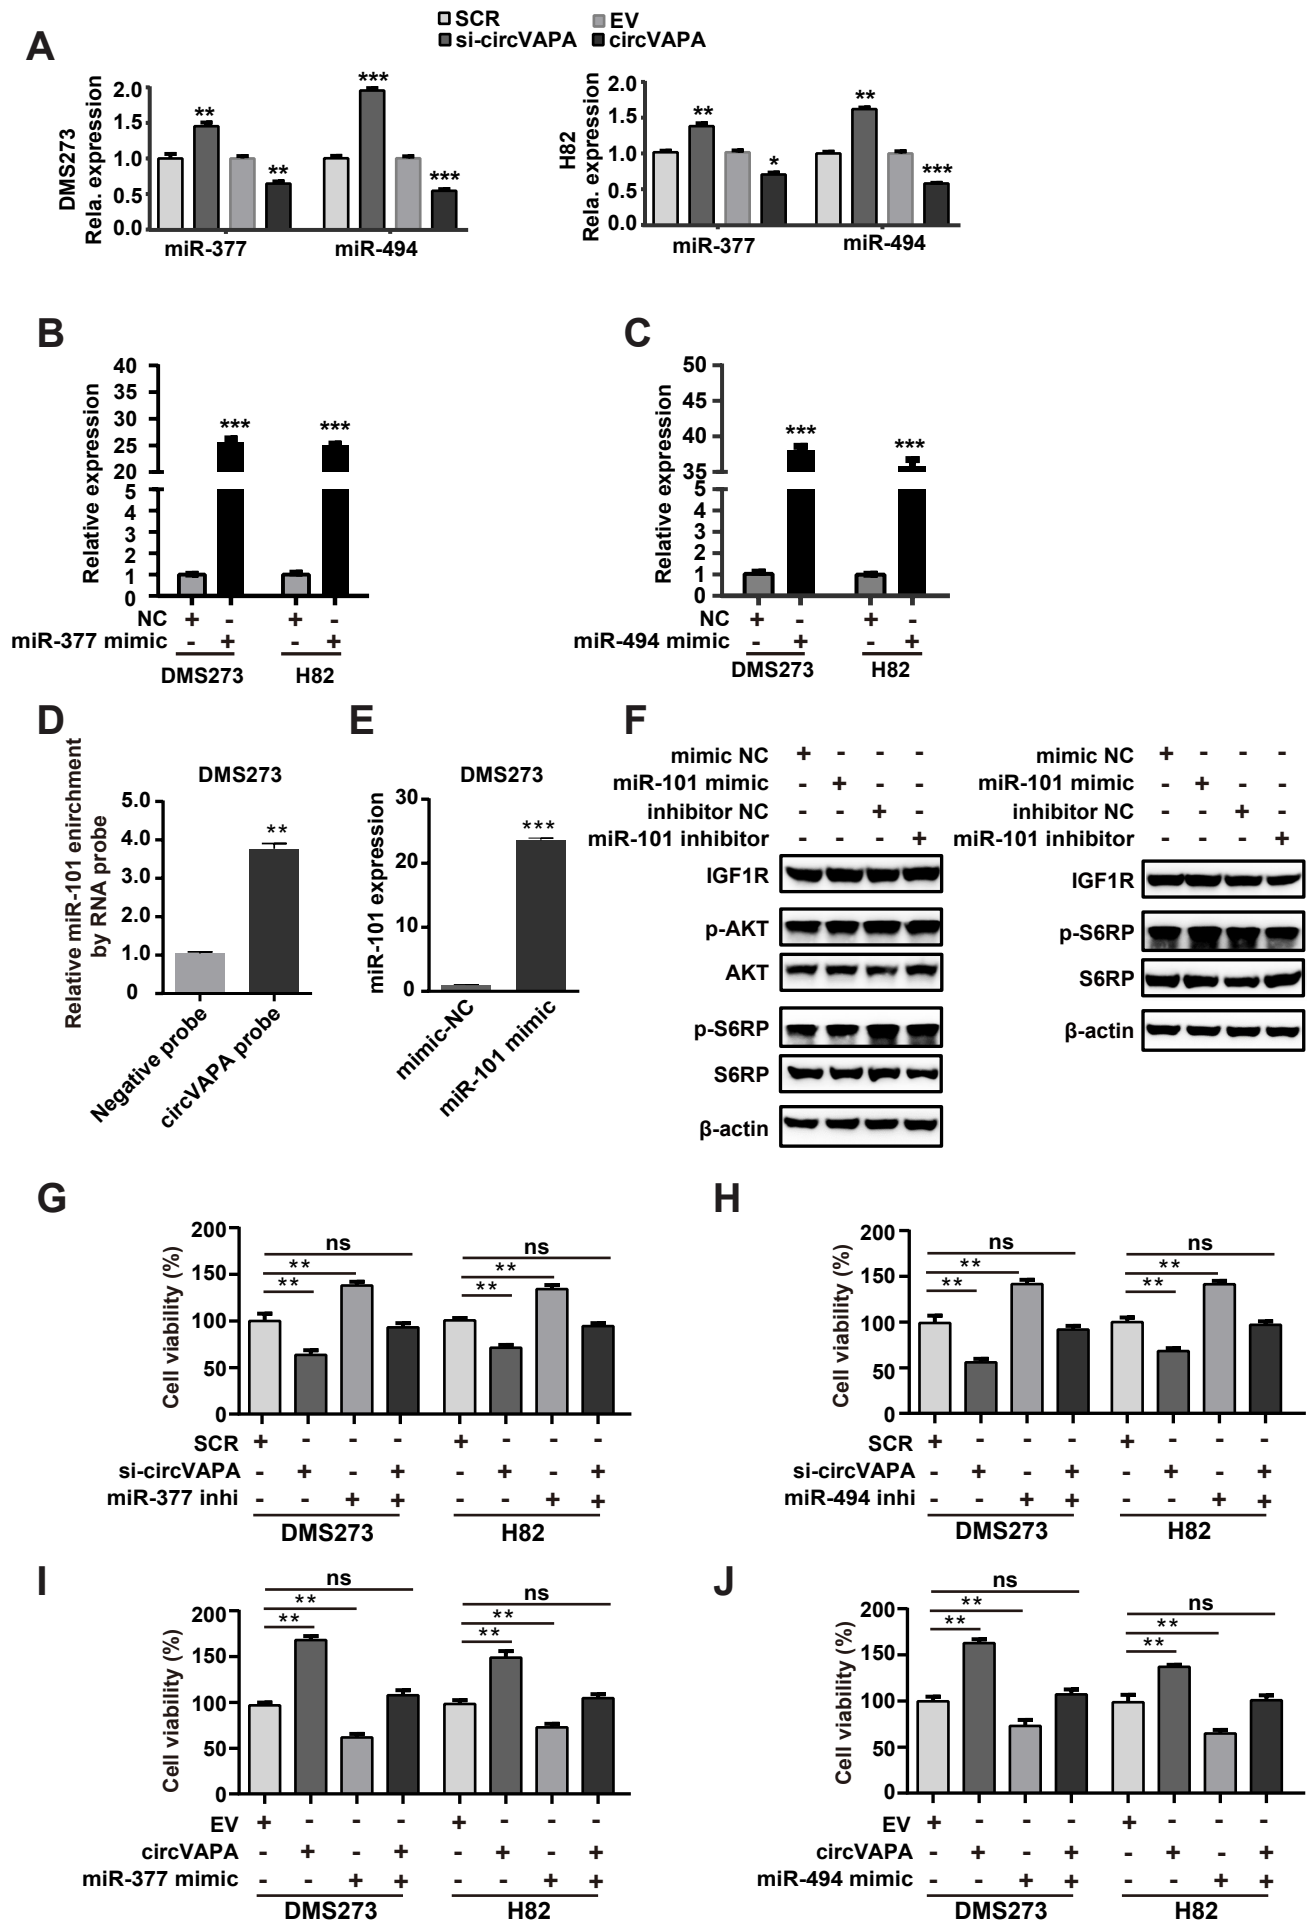

**Figure S3.**

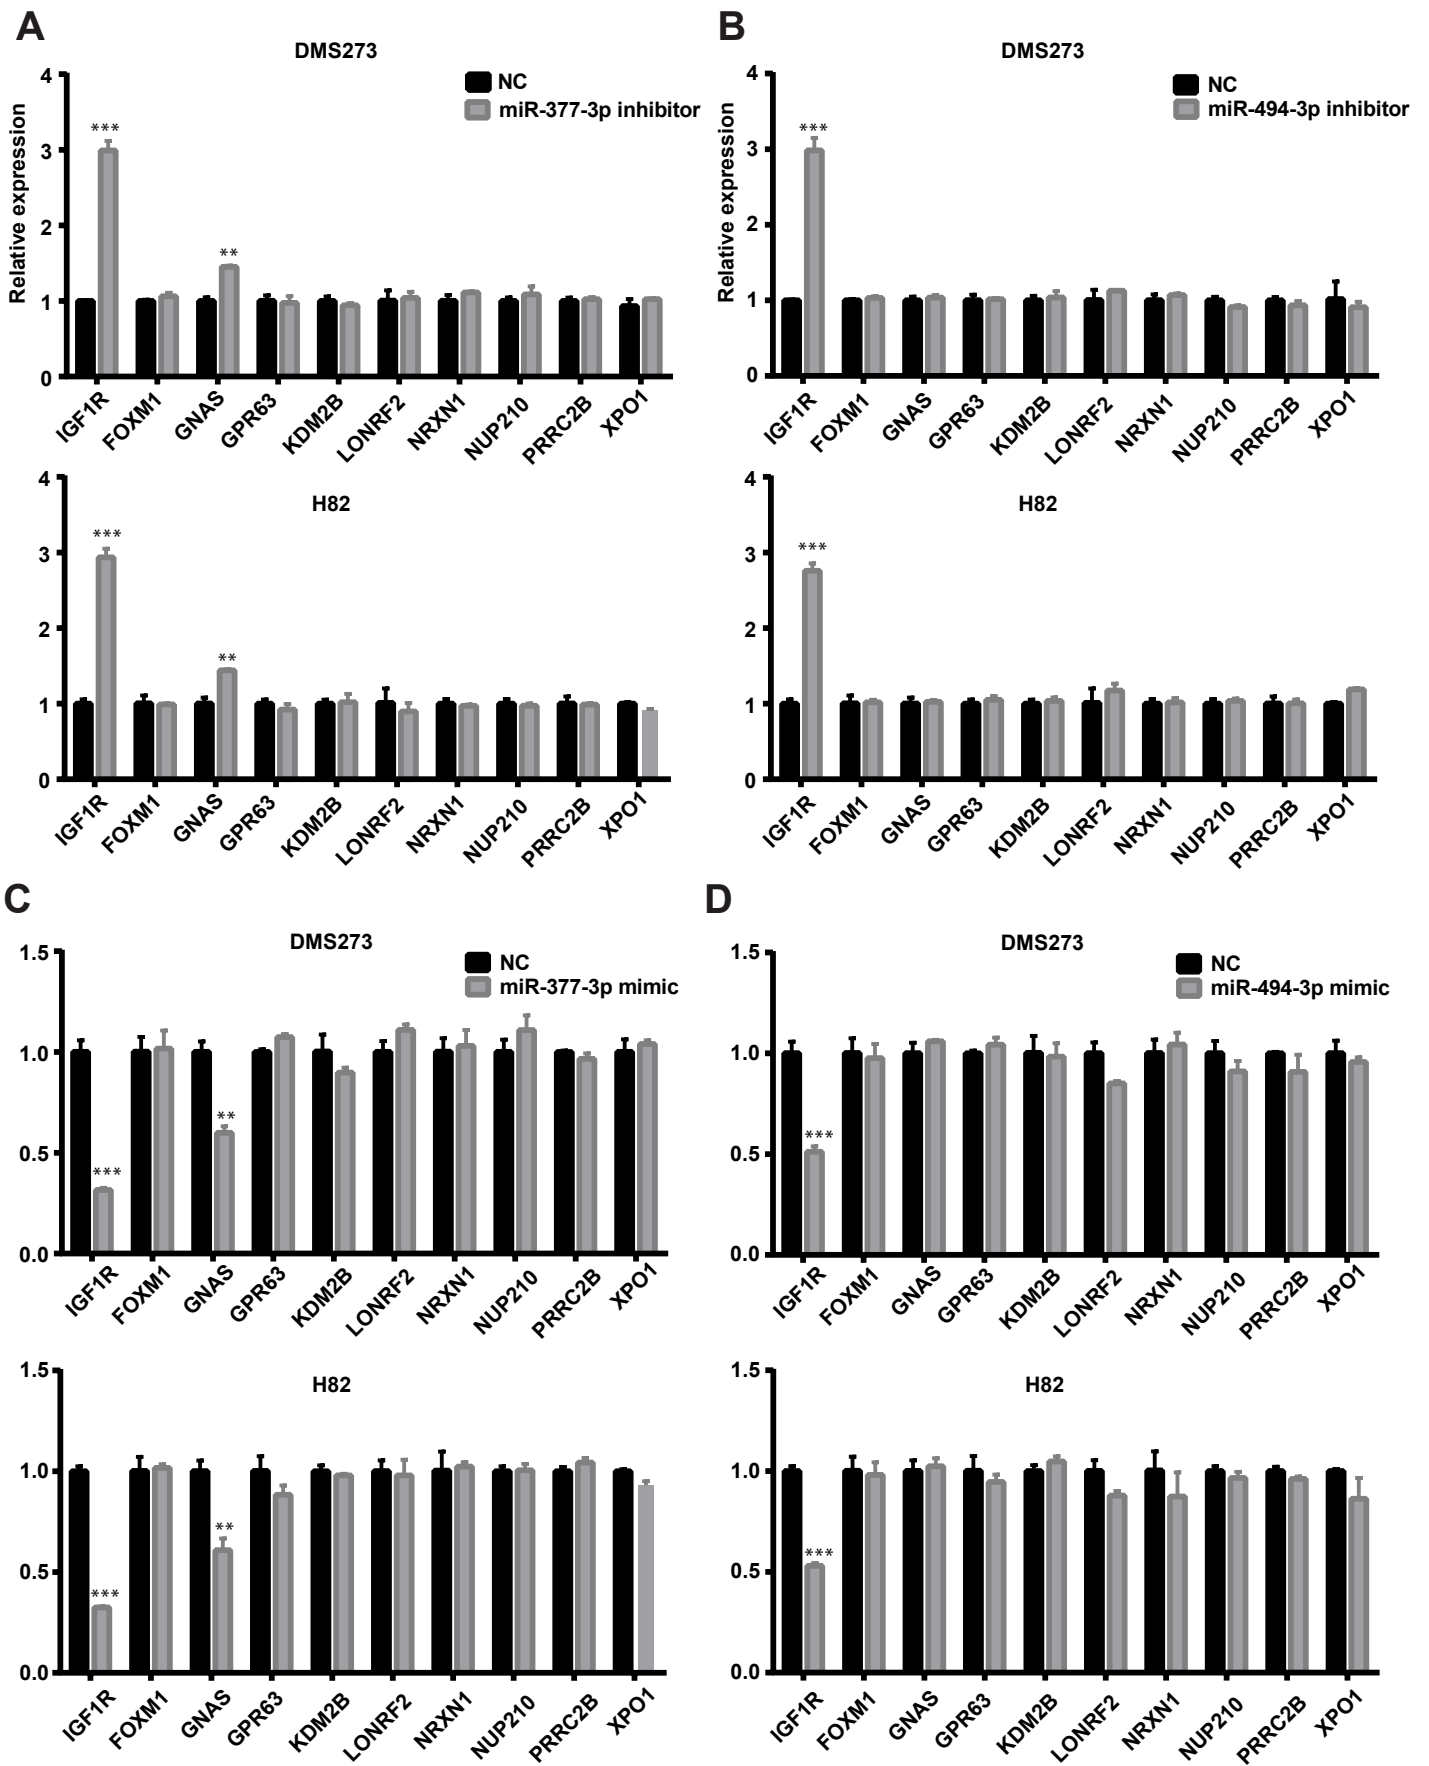

Figure S4.

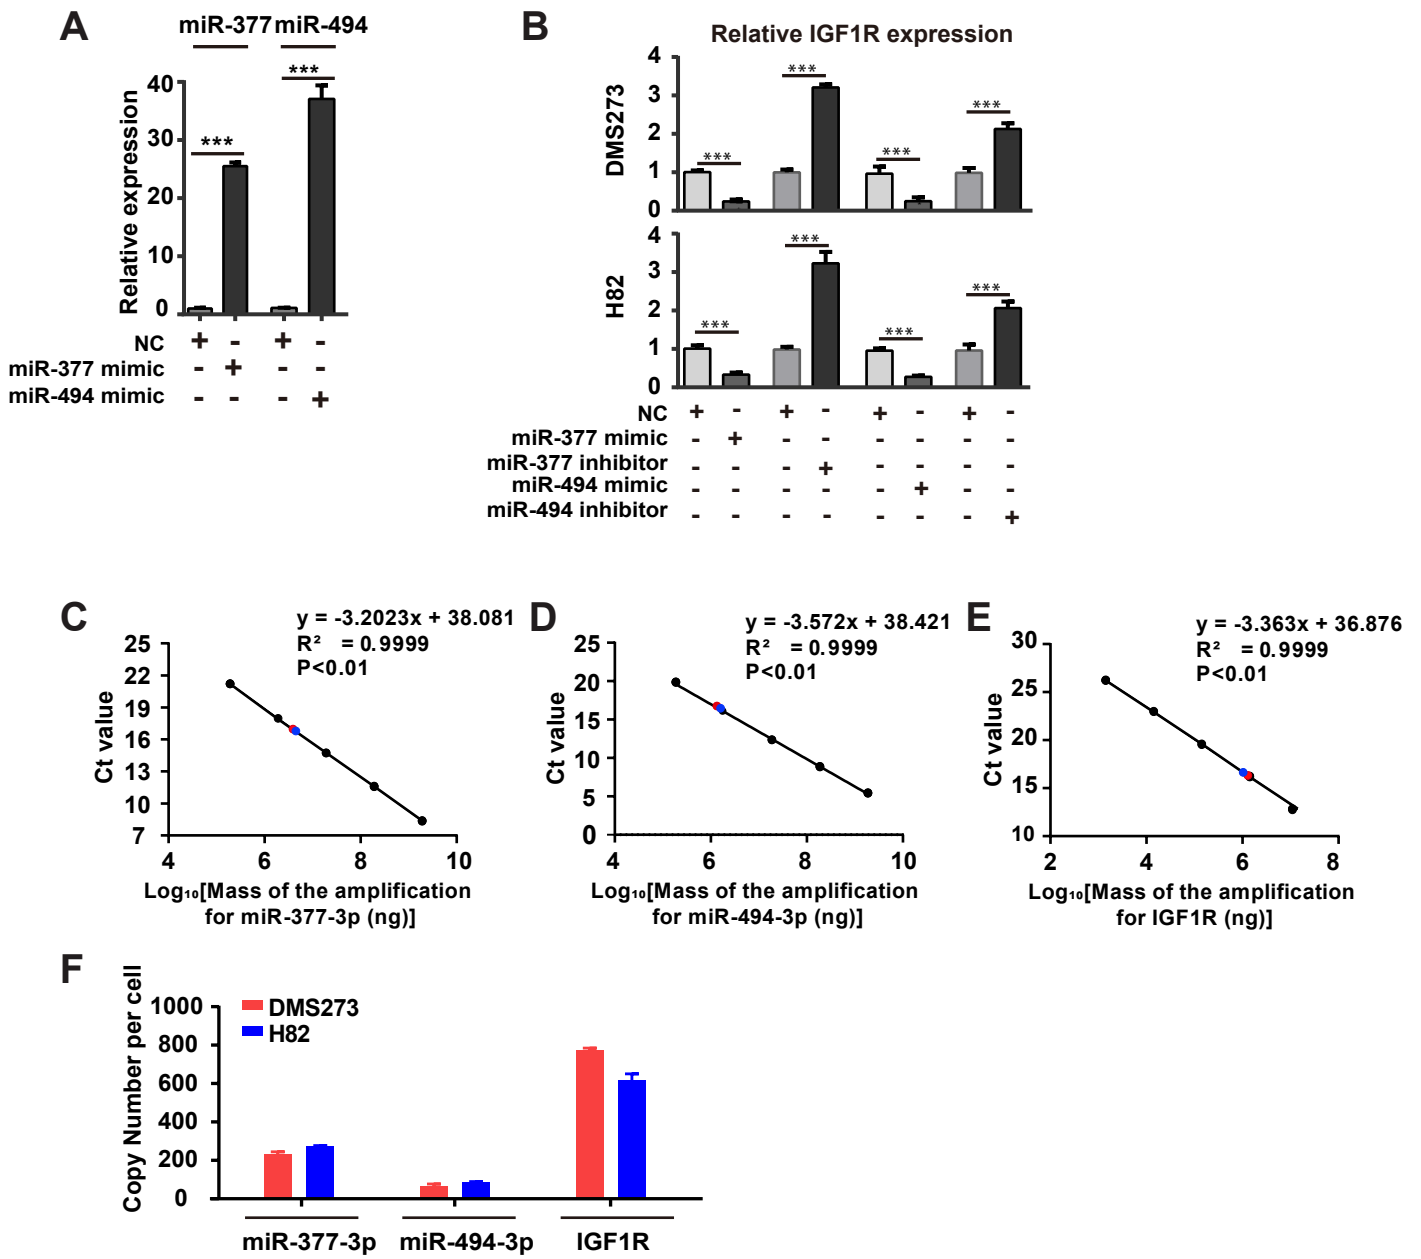

Figure S5.

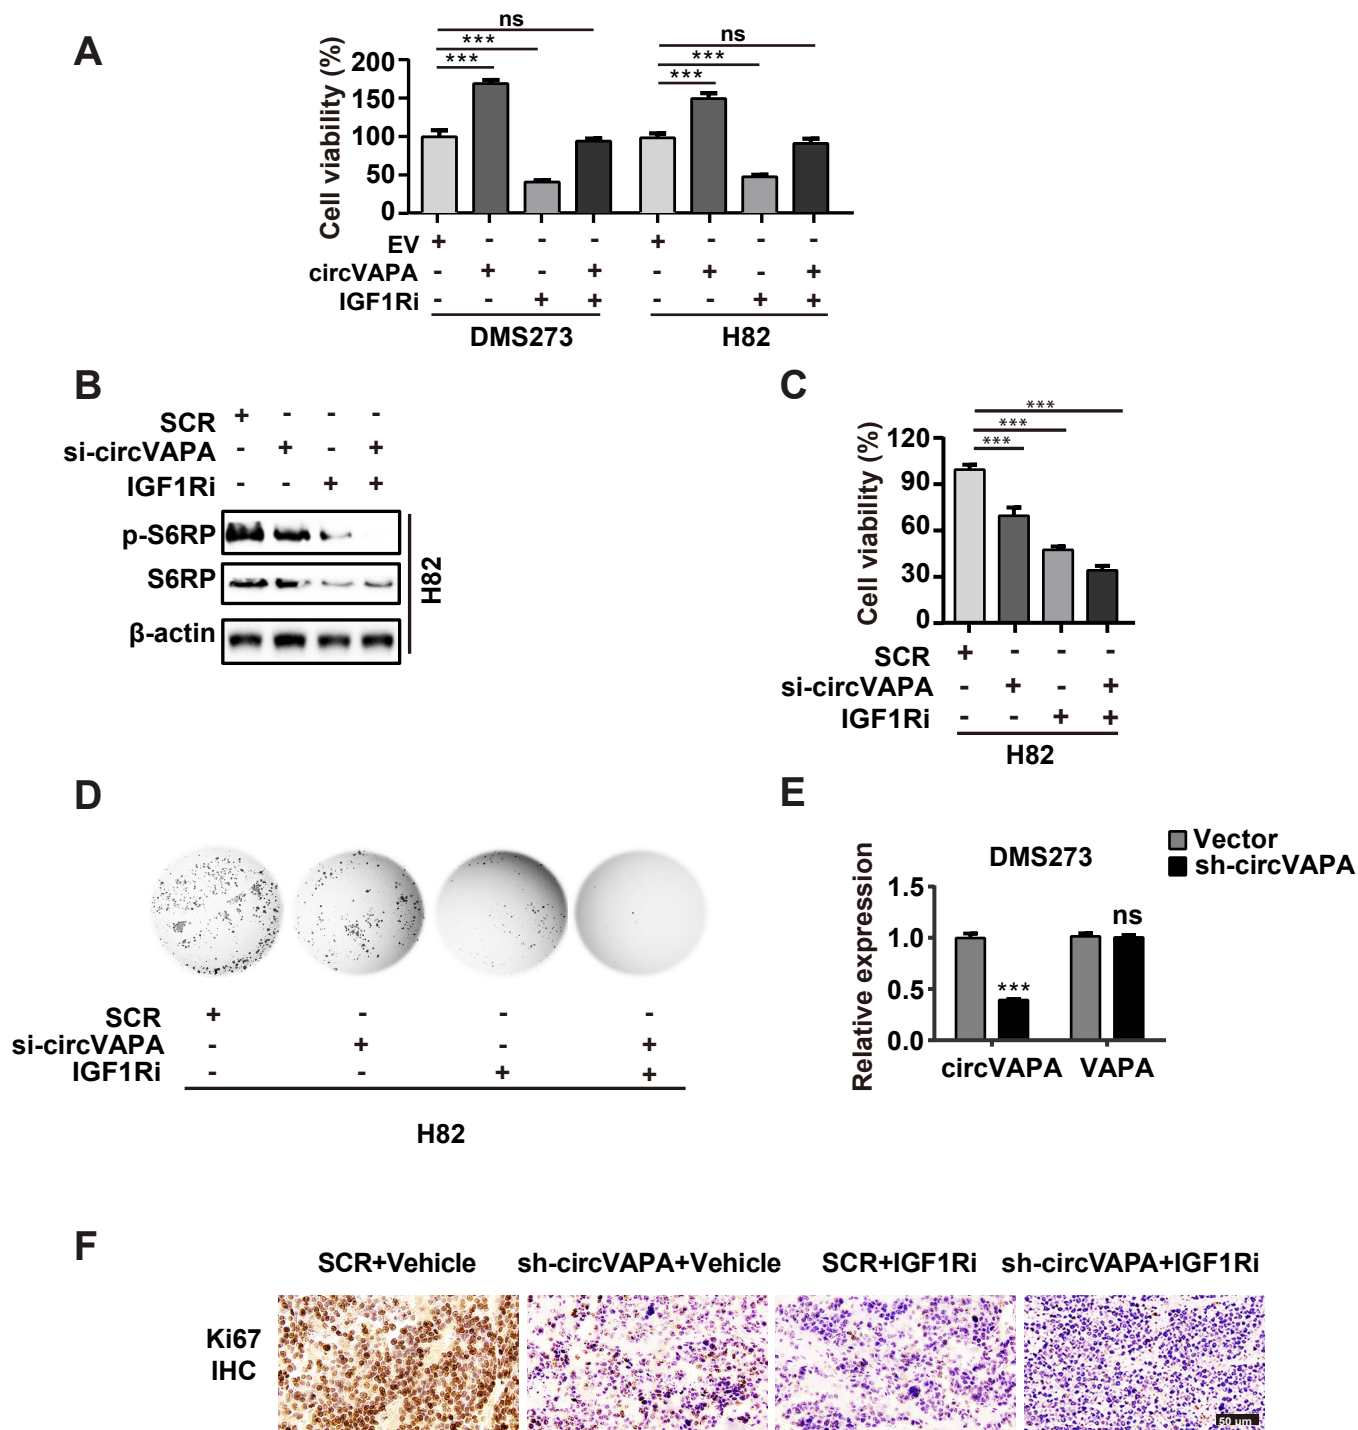

Figure S6.
